# Supplementary material
Source: Royal Society of Chemistry journal article supplement (https://www.rsc.org/suppdata/cc/1999/93/808739c.doc)
Supplement: Supplementary file 1 [file 808739c.doc]

**Supplementary** **data**

**Novel** **discotic** **mesogen**: **synthesis** **and** **liquid** **crystalline** **behavior** **of** **TAAB** (**tetrabenzo**[***b***,***f***,***j***,***n***][**1**,**5**,**9**,**13**]**tetraazacyclohexadecine**) **derivatives** **with** **long** **alkoxy** **chains**

Seok Ho Kang,*a* Miok Kim,*a* Hyung-Kun Lee,*a* Yoonsok Kang,*b* Wang-Cheol Zin*b* and Kimoon Kim**a*

*a* *National* *Research* *Initiative* *Center* *for* *Smart* *Supramolecules*, *aDepartment* *of* *Chemistry*, *and* *b* *Department* *of* *Materials* *Science* *and* *Engineering*, *Pohang* *University* *of* *Science* *and* *Technology*, *San* *31*, *Hyohadong*, *Pohang* *790*-*784*, *South* *Korea*. *E-mail: kkim@postech.ac.kr*

**2a**: 1-Bromooctane (7.0 ml, 34 mmol) and K2CO3 (11.65 g, 84.34 mmol) were added to a 50 ml acetone solution of 3,4-dihydroxybenzaldehyde (2.33 g, 16.9 mmol) and the mixture was refluxed for 3 days. The reaction mixture was then filtered hot and the filtrate was evaporated to dryness. The crude product was purified by chromatography on silica gel by eluting CH2Cl2 (4.18 g, 68%). *δ*H(CDCl3, 300 MHz) 0.86 (t, 6H), 1.43 (m, 20H), 1.85 (m, 4H), 4.07 (t, 4H), 6.91 (d, 1H), 7.37 (t, 2H), 9.77 (s, 1H). *δ*C(CDCl3, 75 MHz) 14.48, 23.06, 26.35, 26.38, 29.38, 29.46, 29.64, 29.66, 29.71, 29.73, 32.20, 69.45, 111.23, 112.08, 126.97, 130.25, 149.80, 155.03, 191.31. *ν*max(KBr)/cm−1 2960, 2937, 2910, 2894, 2874, 2846, 1689, 1673, 1599, 1584, 1511, 1468, 1440, 1393, 1282, 1268, 1237, 1134, 808. Anal. Calc. for C23H38O3: C, 76.20; H, 10.56. Found: C, 75.92; H, 10.68%.

**2b**: This was prepared from 1-bromodecane (5.0 ml, 21 mmol), K2CO3 (7.33 g, 53.0 mmol) and 3,4-dihydroxybenzaldehyde (1.46 g, 10.60 mmol) by the same method as **2a** (3.21 g, 72%). *δ*H(CDCl3, 300 MHz) 0.88 (t, 6H), 1.45 (m, 28H), 1.88 (m, 4H), 4.07 (t, 4H), 6.94 (s, 1H), 7.41 (s, 1H), 9.81 (s, 1H). *δ*C(CDCl3, 75 MHz) 14.48, 23.07, 26.35, 26.38, 29.39, 29.48, 29.74, 29.97, 32.30, 69.54, 69.57, 111.49, 112.23, 126.93, 130.31, 149.87, 155.11, 191.35. *ν*max(KBr)/cm−1 2955, 2922, 2850, 1687, 1597, 1586, 1510, 1467, 1440, 1393, 1277, 1236, 1166, 1134, 1134, 1067, 1020, 999, 808, 723. Anal. Calc. for C27H46O3: C, 77.46; H, 11.07. Found: C, 77.58; H, 11.23%.

**2c**: This was prepared from 1-bromododecane (30.0 ml, 125 mmol), K2CO3 (15.78 g, 114.2 mmol) and 3,4-dihydroxybenzaldehyde (8.63 g, 62.5 mmol) by the same method as **2a**. (13.27 g, 45%). *δ*H(CDCl3, 300 MHz) 0.88 (t, 6H), 1.57 (m, 36H), 1.88 (m, 4H), 4.08 (q, 4H), 6.94 (s, 1H), 7.41 (s, 1H), 9.81 (s, 1H). *δ*C(CDCl3, 75 MHz) 14.54, 23.11, 26.35, 26.39, 29.37, 29.46, 29.78, 30.03, 30.71, 30.10, 32.34, 69.51, 111.24, 112.09, 127.05, 130.23, 149.81, 155.06, 191.44. *ν*max(KBr)/cm−1 2956, 2921, 2850, 2757, 1687, 1673, 1597, 1586, 1510, 1467, 1440, 1393, 1279, 1237, 1166, 1134, 1069, 1001, 808, 722. Anal. Calc. for C31H54O3: C, 78.43; H, 11.46. Found: C, 78.68; H, 11.52%.

**3a**: A mixture of **2a** (4.01 g, 13.2 mmol), sodium nitrite (0.10 g, 1.4 mmol) and nitric acid (1.65 ml, 41.1 mmol) in CH2Cl2 (40 ml) was stirred at room temperature for 6 h. The mixture was poured into water and extracted with CH2Cl2. The solvent was evaporated under reduced pressure. The crude product was purified by chromatography on silica gel by eluting CH2Cl2–hexane (1:1) (3.29 g, 73%). *δ*H(CDCl3, 300 MHz) 0.88 (t, 6H), 1.47 (m, 28H), 1.90 (m, 4H), 4.13 (t, 4H), 7.35 (s, 1H), 7.55 (s, 1H), 10.40 (s, 1H). *δ*C(CDCl3, 75 MHz) 14.47, 23.04, 26.25, 29.19, 29.62, 30.09, 32.16, 70.12, 70.26, 108.57, 110.07, 125.68, 143.00, 152.71, 153.61, 188.31. *ν*max(KBr)/cm−1 2951, 2918, 2872, 2847, 1679, 1605, 1571, 1513, 1467, 1413, 1345, 1285, 1221, 1173, 1081, 1068, 1060, 956, 876. Anal. Calc. for C23H37NO5: C, 67.78; H, 9.15; N, 3.44. Found: C, 67.91; H, 9.12; N, 3.13%.

**3b**: This was prepared from **2b** (1.31 g, 3.12 mmol), sodium nitrite (0.03 g, 0.4 mmol) and nitric acid (0.5 ml, 12.5 mmol) by the same method as **3a** (1.19 g, 82%). *δ*H(CDCl3, 300 MHz) 0.88 (t, 6H), 1.47 (m, 28H), 1.91 (m, 4H), 4.13 (t, 4H), 7.36 (s, 1H), 7.56 (s, 1H), 10.41 (s, 1H). *δ*C(CDCl3, 75 MHz) 14.51, 23.08, 26.25, 29.16, 29.31, 29.68, 29.73, 29.94,29.96, 32.30, 69.85, 70.11, 70.25, 108.53, 111.03, 125.66, 143.98, 152.69, 153.60, 188.34. *ν*max(KBr)/cm−1 2952, 2917, 2871, 2849, 1679,1603,1572, 1518, 1467, 1413, 1345, 1285, 1220, 1173, 1074, 1058, 977, 879, 725. Anal. Calc. for C27H45 NO5: C, 69.94; H, 9.78; N, 3.02. Found: C, 69.87; H, 9.83; N, 2.83%.

**3c**: This was prepared from **2c** (1.34 g, 5.95 mmol), sodium nitrite (0.05 g, 0.83 mmol) and nitic acid (0.95 ml, 23.8 mmol) by the same method as **3a** (1.29 g, 80%). *δ*H(CDCl3, 300 MHz) 0.88 (t, 6H), 1.55 (m, 36H), 1.88 (m, 4H), 4.13 (t, 4H), 7.35 (s, 1H), 7.55 (s, 1H), 10.42 (s, 1H). *δ*C(CDCl3, 75 MHz) 14.54, 23.10, 26.26, 29.15, 29.19, 29.69, 29.78, 29.98, 30.07, 30.09, 32.33, 70.11, 70.24, 108.53, 111.02, 125.66, 143.98, 152.68, 153.59, 188.37. *ν*max(KBr)/cm−1 2954, 2915, 2872, 2848, 1679, 1605, 1572, 1517, 1467, 1413, 1345, 12845, 1220, 1173, 1076, 1059, 988, 878, 724. Anal. Calc. for C31H53 NO5: C, 71.64; H, 10.28; N, 2.70. Found: C, 71.97; H, 10.18; N, 2.41%.

**4a**: A mixture of **3a** (0.50 g, 1.2 mmol) and 10% Pd/C (1.65 g, 6.86 mmol) in CH2Cl2 (20 ml) was stirred for 8 h at room temperature in the presence of hydrogen atmosphere. The mixture was filtered and the solvent was evaporated under reduced pressure. The crude product was purified by chromatography on silica gel by eluting CH2Cl2 (0.39 g, 83%). *δ*H(CDCl3, 300 MHz) 0.89 (t, 6H), 1.44 (m, 20H), 1.86 (m, 4H), 3.98 (t, 4H), 6.01 (s, 1H), 6.06 (s, 1H), 9.63 (s, 1H). *δ*C(CDCl3, 75 MHz) 14.71, 23.06, 26.37, 26.44, 29.32, 29.63, 29.68, 29.80, 29.86, 32.19, 32.23, 69.17, 71.31, 99.60, 111.95, 120.82, 140.91, 147.93, 157.42, 191.81. *ν*max(KBr)/cm−1 3434, 3334, 2957, 2925, 2850, 2724, 1665, 1627, 1557, 1509, 1467, 1432, 1394, 1282, 1255, 1152,1060, 844, 797. Anal. Calc. for C23H39NO3: C, 73.17; H, 10.41; N, 3.71. Found: C, 73.33; H, 10.25; N, 3.59%.

**4b**: This was prepared from **3b** (2.02 g, 4.36 mmol) and 10% Pd/C by the same method as **4a** (1.13 g, 60%). *δ*H(CDCl3, 300 MHz) 0.88 (t, 6H), 1.44 (m, 28H), 1.84 (m, 4H), 3.98 (t, 4H), 6.01 (s, 1H), 6.06 (s, 1H), 9.63 (s, 1H). *δ*C(CDCl3, 75 MHz) 14.49, 23.08, 26.38, 26.44, 29.32, 29.74, 29.86, 29.98, 32.31, 69.17, 71.32, 99.60, 111.96, 120.82, 140.93, 147.93, 157.43, 191.81. *ν*max(KBr)/cm−1 3433, 3335, 2958, 2930, 2915, 2874, 2849, 2726, 1668, 1659, 1603, 1589, 1557, 1547, 1395, 1291, 1280, 1257, 1245, 1159, 1146. Anal. Calc. for C27H47 NO3: C, 74.78; H, 10.92; N, 3.23. Found: C, 74.51; H, 11.04; N, 2.84%.

**4c**: This was prepared from **3c** (0.43 g, 0.83 mmol) and 10% Pd/C by the same method as **4a** (0.29 g, 72%). *δ*H(CDCl3, 300 MHz) 0.88 (t, 6H), 1.44 (m, 28H), 1.86 (m, 4H), 3.98 (t, 4H), 6.01 (s, 2H), 6.06 (s, 1H), 6.91 (s, 1H), 9.63 (s, 1H). *δ*C(CDCl3, 75 MHz) 14.53, 23.10, 26.38, 26.45, 29.31, 29.78, 29.86, 30.02, 30.06, 32.33, 69.16, 71.26, 99.56, 111.91, 120.67, 140.88, 147.92, 157.38, 191.82. *ν*max(KBr)/cm−1 3471, 3326, 2957, 2918, 2874, 2850, 1657, 1652, 1590, 1554, 1544, 1508, 1470, 1434, 1397, 1385, 1288, 1247, 1160, 1143, 720. Anal. Calc. for C27H47 NO3: C, 76.02; H, 11.32; N, 2.86. Found: C, 75.98; H, 11.58; N, 2.63%.

**5a**: To a solution of **4a** (0.30 g, 0.79 mmol) in EtOH (15 ml) was added 5 drops of 48% HBF4. The reaction mixture was stirred under reflux for 3 hours. After cooling to room temperature, the black solid was filtered, washed with EtOH (0.23 g, 18%). *δ*H(CDCl3, 300 MHz) 0.88 (t, 24H), 1.45 (m, 80H), 1.75 (m, 16H), 3.87 (t, 16H), 6.48 (s, 4H), 6.63 (s, 4H), 8.02 (s, 4H). *δ*C(CDCl3, 75 MHz) 14.55, 23.10, 23.16, 26.50, 26.53, 29.72, 29.78, 29.88, 30.22, 30.26, 32.42, 32.43, 69.39, 69.42, 69.67, 69.69, 69.75, 99.93, 117.74, 119.87, 138.47, 149.27, 154.69, 157.64. *δ*F(CDCl3, ref. CF3CO2D) −72.96. *ν*max(KBr)/cm−1 2954, 2923, 2854, 1633, 1589, 1554, 1521, 1467, 1365, 1280, 1229, 1124, 1083, 1054. FAB-MS: m/e 1438.1 (M+H+-2HBF4). *λ*max(CHCl3)/nm (log *ε*) 339 (4.67), 425 (4.18). Anal. Calc. for for C92H150N4O8B2F8: C, 68.47; H, 9.36; N, 3.47. Found: C, 68.60; H, 9.26; N, 3.55%.

**5b**: This was prepared from **4b** (0.29 g, 0.66 mmol) and 48% HBF4 by the same method as **5a** (0.17 g, 14%). *δ*H(CDCl3, 300 MHz) 0.90 (t, 24H), 1.52 (m, 112), 1.76 (m, 16H), 3.94 (q, 16H), 6.58 (s, 4H), 6.72 (s, 4H), 8.12 (s, 4H). *δ*C(CDCl3, 75 MHz) 14.53, 23.15, 26.56, 29.75, 29.94, 30.31, 32.44, 69.36, 69.65, 99.85, 117.62, 119.84, 138.40, 149.25, 154.66, 157.54. *δ*F(CDCl3, ref. CF3CO2D) −73.65. *ν*max(KBr)/cm−1 2924, 2854, 1634, 1590, 1522, 1468, 1366, 1282, 1229, 1125, 1038, 850, 722. *m/z* (FAB) 1663.1 (M + H+ − 2HBF4). *λ*max(CHCl3)/nm (log *ε*) 339 (4.72), 423 (4.24). Anal. Calc. for for C108H182N4O8B2F8: C, 70.57; H, 9.97; N, 3.05. Found: C, 70.39; H, 10.11; N, 3.10%.

**5c**: This was prepared from **4c** (0.43 g, 0.83 mmol) and 48% HBF4 by the same method as **5a** (0.25 g, 21%). *δ*H(CDCl3, 300 MHz) 0.87 (t, 24H), 1.44 (m, 144H), 1.73 (m, 16H), 3.83 (q, 16H), 6.42 (s, 4H), 6.58 (s, 4H), 7.96 (s, 4H). *δ*C(CDCl3, 75 MHz) 14.51, 23.13, 24.91, 26.56, 29.75, 29.89, 30.24, 30.33, 32.40, 69.39, 69.66, 99.92, 117.70, 119.87, 124.68, 138.44, 149.29, 154.71, 157.56. *δ*F(CDCl3, ref. CF3CO2D) −73.60. *ν*max(KBr)/cm−1 2960, 2921, 2852, 1635, 1590, 1555, 1522, 1469, 1380, 1365, 1284, 1266, 1229, 1209, 1128, 1084, 1054, 1035, 1004, 721. *m/z* (FAB) 1887.7 (M + H+ − 2HBF4). *λ*max(CHCl3)/nm (log *ε*) 340 (4.44), 423 (3.98). Anal. Calc. for for C124H214N4O8B2F8: C, 72.21; H, 10.46; N, 2.72. Found: C, 71.97; H, 10.32; N, 2.84%.

**
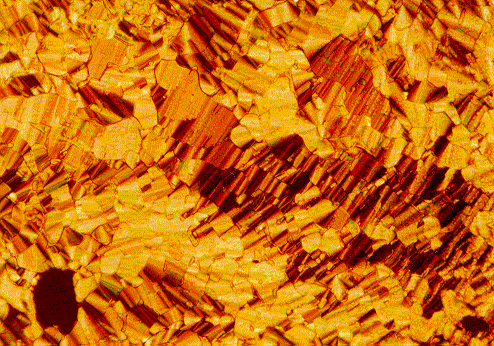
**

**Fig.** **1** Texture of **5c** under a polarizing microscope at 70 °C.
